# Supplementary material
Source: PubMed Central journal article supplement (PMC5096970)
Supplement: NIHMS816472-supplement-supplement_1.pdf [file NIHMS816472-supplement-supplement_1.pdf]

## SUPPLEMENTARY TABLES

Supplementary Table 1. Antibiotic classes received and risk for healthcare facility-onset CDI in the ICU.

| Antibiotic Class                                | CDI/Total Exposed (%) | Adjusted HR* (95% CI) |
|-------------------------------------------------|-----------------------|-----------------------|
| No antibiotics                                  | 32/5,895 (0.5)        | Ref                   |
| Aminoglycosides                                 | 53/1,909 (2.8)        | 1.08 (0.77-1.52)      |
| Aminopenicillins                                | 7/301 (2.3)           | 1.03 (0.48-2.21)      |
| Aztreonam                                       | 14/560 (2.5)          | 1.23 (0.69-2.19)      |
| Carbapenems                                     | 34/1,350 (2.5)        | 0.84 (0.55-1.30)      |
| Cephalosporins (all)                            | 87/6,179 (1.4)        | 0.77 (0.56-1.07)      |
| Clindamycin                                     | 5/254 (2.0)           | 0.97 (0.40-2.38)      |
| Daptomycin                                      | 4/125 (3.2)           | 1.19 (0.43-3.33)      |
| Fluoroquinolones                                | 25/950 (2.6)          | 1.03 (0.67-1.59)      |
| Linezolid                                       | 13/639 (2.0)          | 0.67 (0.35-1.27)      |
| Macrolides                                      | 26/1,525 (1.7)        | 0.69 (0.44-1.08)      |
| $\beta$ -lactams/ $\beta$ -lactamase inhibitors | 147/5,350 (2.8)       | 1.61 (1.21-2.15)      |
| Trimethoprim-sulfamethoxazole                   | 15/879 (1.7)          | 0.86 (0.49-1.48)      |
| Vancomycin IV                                   | 172/6,200 (2.8)       | 1.42 (1.05-1.92)      |

ICU, intensive care unit; CDI, *C. difficile* infection; HR, hazard ratio; CI, confidence interval. \*Adjusted for creatinine, albumin, Charlson Comorbidity Index, mechanical ventilation, hemodialysis, ICU type, and proton pump inhibitors.

**Supplementary Table 2. Relationship between PPIs and risk for healthcare facility-onset CDI in the ICU in a subset of the study cohort, stratified by concurrent exposure to antibiotics.**

| <b>PPI Exposure Categories, in Defined Daily Dose*</b> | <b>Adjusted HR* (95% CI)</b> |
|--------------------------------------------------------|------------------------------|
| Without concurrent antibiotics                         |                              |
| None                                                   | Ref                          |
| ≤ 1 defined daily dose                                 | 1.48 (0.40-5.51)             |
| >1 to <2 defined daily dose                            | 1.57 (0.54-4.58)             |
| ≥2 defined daily dose                                  | 0.84 (0.18-3.88)             |
| With concurrent antibiotics                            |                              |
| None                                                   | Ref                          |
| ≤ 1 defined daily dose                                 | 0.26 (0.15-0.45)             |
| >1 to <2 defined daily dose                            | 0.39 (0.27-0.56)             |
| ≥2 defined daily dose                                  | 0.45 (0.30-0.68)             |

HR, hazard ratio; PPI, proton pump inhibitor; ICU, intensive care unit; CDI, *C. difficile* infection; CI, confidence interval. \*A defined daily dose of 1.0 is the equivalent of a mean daily dose of 20 mg omeprazole. \*\*Adjusted for creatinine, albumin, Charlson Comorbidity Index, mechanical ventilation, hemodialysis, ICU type.
